# Supplementary material
Source: publisher site journal article supplement (https://www.dovepress.com/get_supplementary_file.php?f=359960.docx)
Supplement: Supplementary file 1 [file get_supplementary_file.php]

**Supplementary materials**

**Figure S1:** Complete flowchart for study inclusion

**Abbreviations:** LUTSqol, International Consultation on Incontinence Questionnaire Lower Urinary Tract Symptoms Quality of Life; UI-SF, International Consultation on Incontinence Questionnaire Urinary Incontinence Short Form.

**
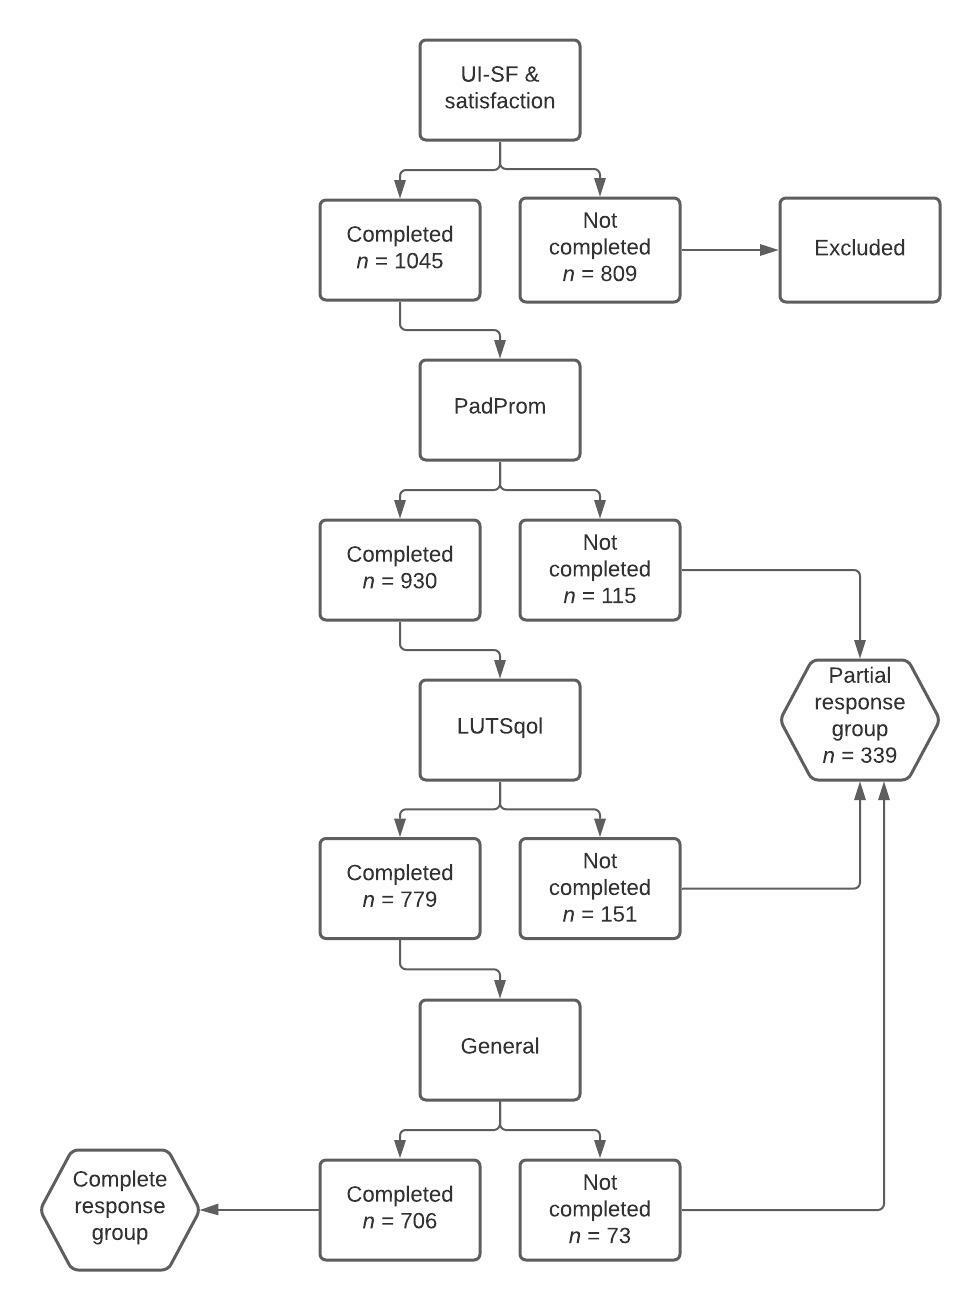
**

|  | **Partial responders**  n = 339 | **Complete responders**  n = 706 | **p-value** |
| --- | --- | --- | --- |
| Age (years) | 63.2 ± 12.0 | 60.4 ± 12.0 | 0.001* |
| Gender |  |  | 0.007 |
| Male | 15 (5.4) | 78 (11.0) |  |
| Female | 261 (94.6) | 628 (89.0) |  |
| Material supply |  |  | 0.294 |
| Pharmacy | 101 (29.8) | 185 (26.2) |  |
| Online supplier | 82 (24.2) | 199 (28.2) |  |
| Shop | 156 (46.0) | 322 (45.6) |  |
| **ICIQ-UI-SF** |  |  |  |
| Satisfaction | 12.9 ± 3.6 | 12.8 ± 3.5 | 0.678 |
| Material | 8.4 ± 2.8 | 8.7 ± 2.7 | 0.043 |
| Care | 7.5 ± 2.9 | 7.2 ± 3.0 | 0.304 |
| **ICIQ-PadPROM** | n = 224 | n = 706 |  |
| Physical | 10.8 ± 4.1 | 10.4 ± 4.2 | 0.253 |
| Psychological | 5.9 ± 4.0 | 5.9 ± 3.9 | 0.861 |
| Social | 5.1 ± 3.5 | 4.3 ± 3.3 | 0.001* |
| Burden | 4.9 ± 2.3 | 4.8 ± 2.5 | 0.670 |
| **ICIQ-LUTSqol** | n = 73 | n = 706 |  |
| Score | 41.3 ± 15.3 | 40.5 ± 14.1 | 0.648 |

**Table S1:** Comparison of characteristics and outcomes between partial and complete survey responders

**Notes:** Data presented as mean ± standard deviation or n (% valid). Statistical analysis by t-test for continuous data and by χ2 test for categorical variables. * p < 0.001, considered significant.

**Abbreviations:** ICIQ, International Consultation on Incontinence Questionnaire; ICIQ-LUTSqol, ICIQ Lower Urinary Tract Symptoms Quality of Life; ICIQ-PadPROM, ICIQ for Absorbent Pads; ICIQ-UI-SF, ICIQ Urinary Incontinence Short Form.

**Table S2:** Differences in survey questionnaire outcomes in patients with urinary incontinence who receive continence products either by pharmacy, national supplier, or shop, stratified for severity of symptoms.

|  | **Pharmacy** | **National supplier** | **Shop** | **p-value** |
| --- | --- | --- | --- | --- |
|  |  |  |  |  |
| **Slight symptoms** | N=7 | N=3 | N=14 |  |
| Satisfaction Products | 10.6 ± 1.8 | 11.3 ± 1.2 | 8.2 ± 2.5 | 0.029 |
| Satisfaction Care | 7.7 ± 3.2 | 9.0 ± 3.0 | 8.5 ± 2.3 | 0.739 |
| **Moderate symptoms** | N=108 | N=95 | N=246 |  |
| Satisfaction Products | 9.4 ± 2.6 | 9.3 ± 2.6 | 8.2 ± 2.6 | <0.001* |
| Satisfaction Care | 8.4 ± 2.9 | 8.4 ± 2.8 | 6.9 ± 2.6 | <0.001* |
| **Severe symptoms** | N=153 | N=159 | N=210 |  |
| Satisfaction Products | 9.1 ± 2.6 | 9.2 ± 2.6 | 7.6 ± 2.7 | <0.001* |
| Satisfaction Care | 7.8 ± 3.0 | 7.9 ± 3.0 | 5.9 ± 2.7 | <0.001* |
| **Very severe symptoms** | N=18 | N=24 | N=8 |  |
| Satisfaction Products | 7.5 ± 3.9 | 9.4 ± 2.6 | 6.4 ± 3.0 | 0.040 |
| Satisfaction Care | 6.9 ± 4.0 | 8.1 ± 3.3 | 4.8 ± 3.2 | 0.082 |

**Notes:** Data presented as mean ± standard deviation or n (% valid). Statistical analysis by stratification based on categorization of ICIQ-UI-SF into: slight, moderate, sever and very severe symptoms. * p < 0.001, considered significant.

**Abbreviations:** ICIQ, International Consultation on Incontinence Questionnaire; ICIQ-UI-SF, ICIQ Urinary Incontinence Short Form.
